# Supplementary material for: Successive Fermentation of Aguamiel and Molasses by Aspergillus oryzae and Saccharomyces cerevisiae to Obtain High Purity Fructooligosaccharides
Source: MDPI journal article supplement (doi:10.3390/foods11121786), 2022-06-17
Supplement: s1 [file s1]

## Supplementary Material

### Successive Fermentation of Aguamiel and Molasses by *Aspergillus oryzae* and *Saccharomyces cerevisiae* to Obtain High Purity Fructooligosaccharide

Orlando de la Rosa <sup>1</sup>, Adriana Carolina Flores-Gallegos <sup>1</sup>, Diana Muñíz-Márquez <sup>2</sup>, Juan C. Contreras-Esquivel <sup>1</sup>, José A. Teixeira <sup>3,4</sup>, Clarisse Nobre <sup>3,4,\*</sup> and Cristóbal N. Aguilar <sup>1,\*</sup>

<sup>1</sup> Bioprocesses & Bioproducts Research Group, Food Research Department, School of Chemistry, Universidad Autónoma de Coahuila, Saltillo 25280, Mexico; orlandorosaflores@uadec.edu.mx (O.d.l.R.); carolinaflores@uadec.edu.mx (A.C.F.-G.); carlos.contreras@uadec.edu.mx (J.C.C.-E.)

<sup>2</sup> Tecnológico Nacional de México, Instituto Tecnológico de Ciudad Valles, Ciudad Valles 79010, Mexico; diana.marquez@tecvalles.mx

<sup>3</sup> Centre of Biological Engineering, Campus de Gualtar, University of Minho, 4710-057 Braga, Portugal; jateixeira@deb.uminho.pt

<sup>4</sup> LABBELS—Associate Laboratory, 4710-057 Braga, Portugal

\* Correspondence: clarissenobre@deb.uminho.pt (C.N.); cristobal.aguilar@uadec.edu.mx (C.N.A.)

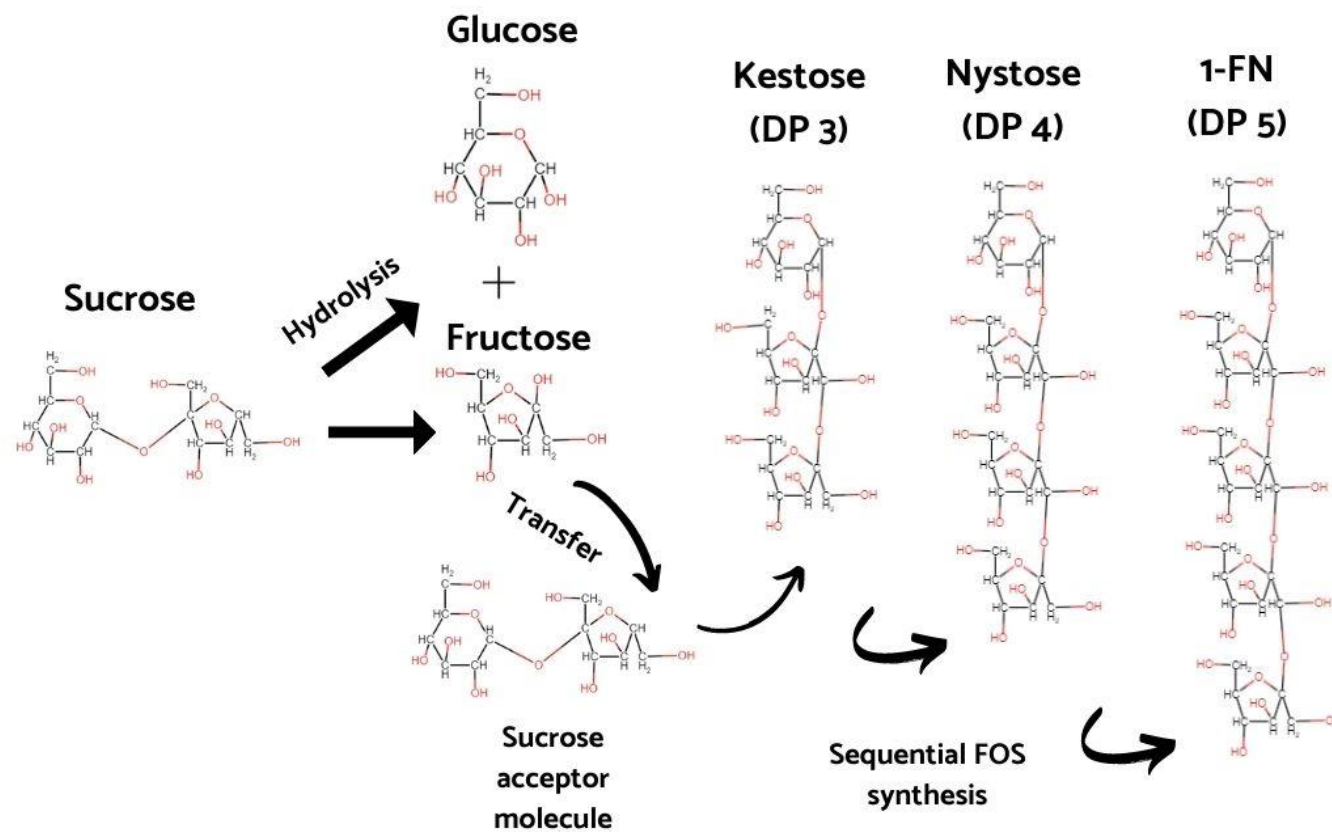

**Figure S1.** Schematic representation of fructooligosaccharides (FOS) structures obtained by synthesis during fermentation with strain *Aspergillus oryzae* DIA-MF. DP: degree of polymerization; 1-FN: 1-Fructofuranosyl nystose.

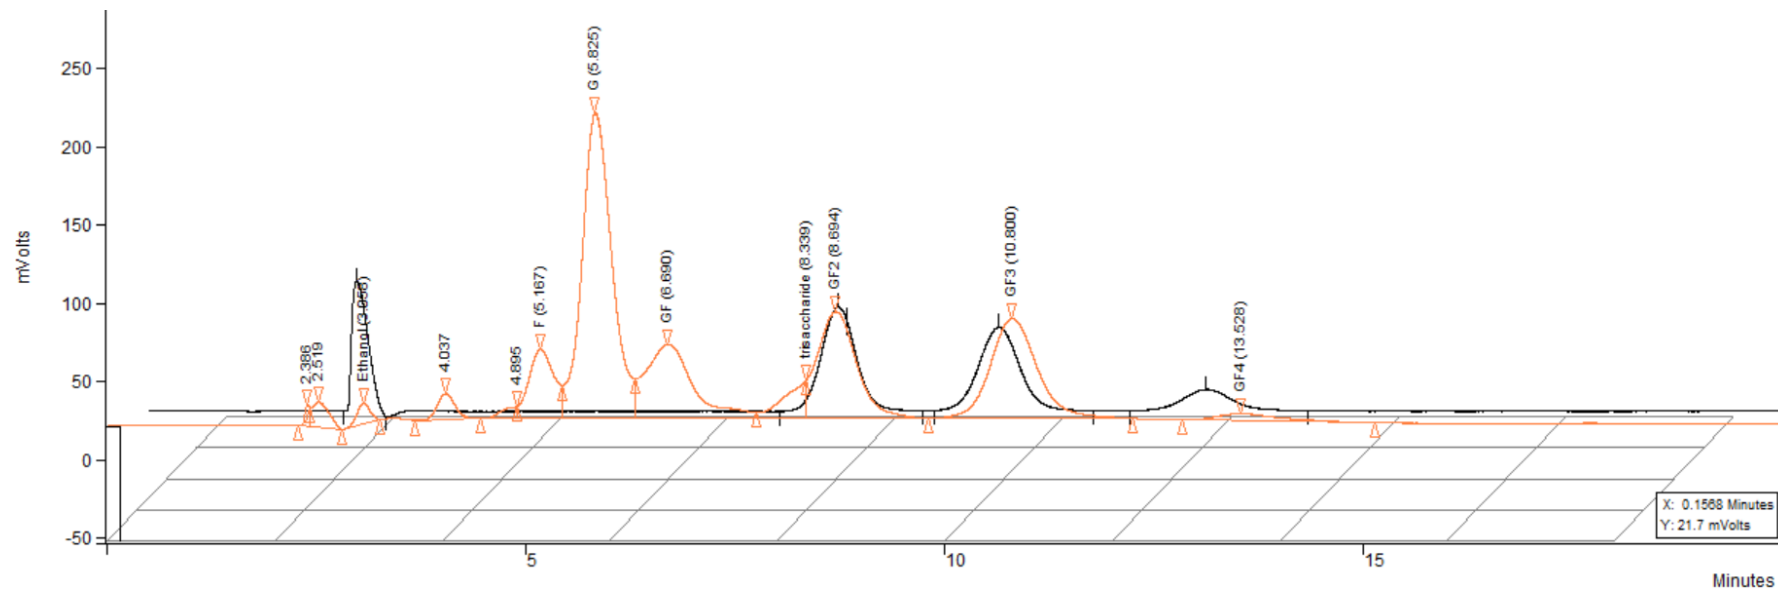

**Figure S2.** Chromatograms obtained by HPLC for: a mixture of standard fructooligosaccharides (FOS) (Black line) and for a fermentation broth sample obtained from the fermentation of Aguamiel and Molasses (AgMe) with *Aspergillus oryzae* (Orange line). Fructose (F), glucose (G), sucrose (GF), unidentified compound - possibly a trisaccharide, kestose (GF2), nystose (GF3), 1-Fructofuranosyl nystose (GF4).

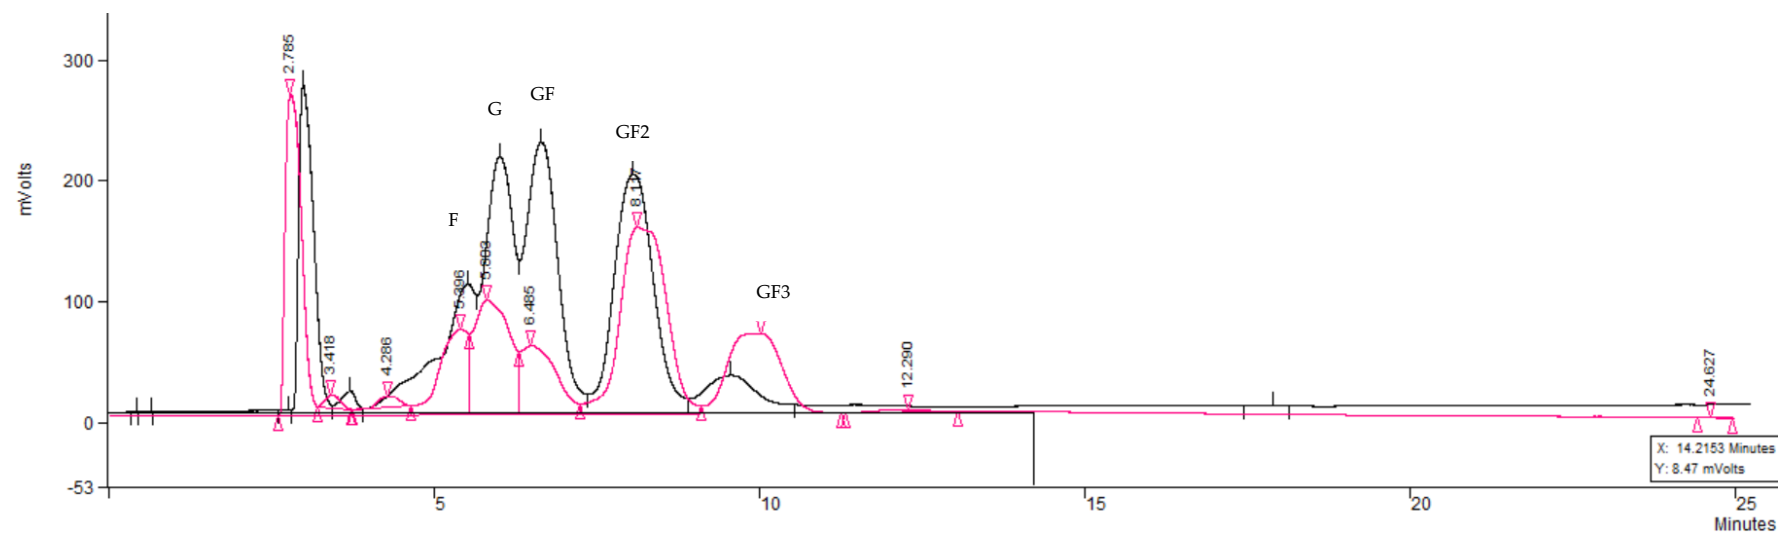

**Figure S3.** Chromatograms obtained by HPLC for: for a fermentation broth sample obtained from the fermentation of Aguamiel and Molasses (AgMe) with *Aspergillus oryzae* before (black line) and after (pink line) inoculation of *Saccharomyces cerevisiae* 227 (S227). Fructose (F), glucose (G), sucrose (GF), kestose (GF2), nystose (GF3).

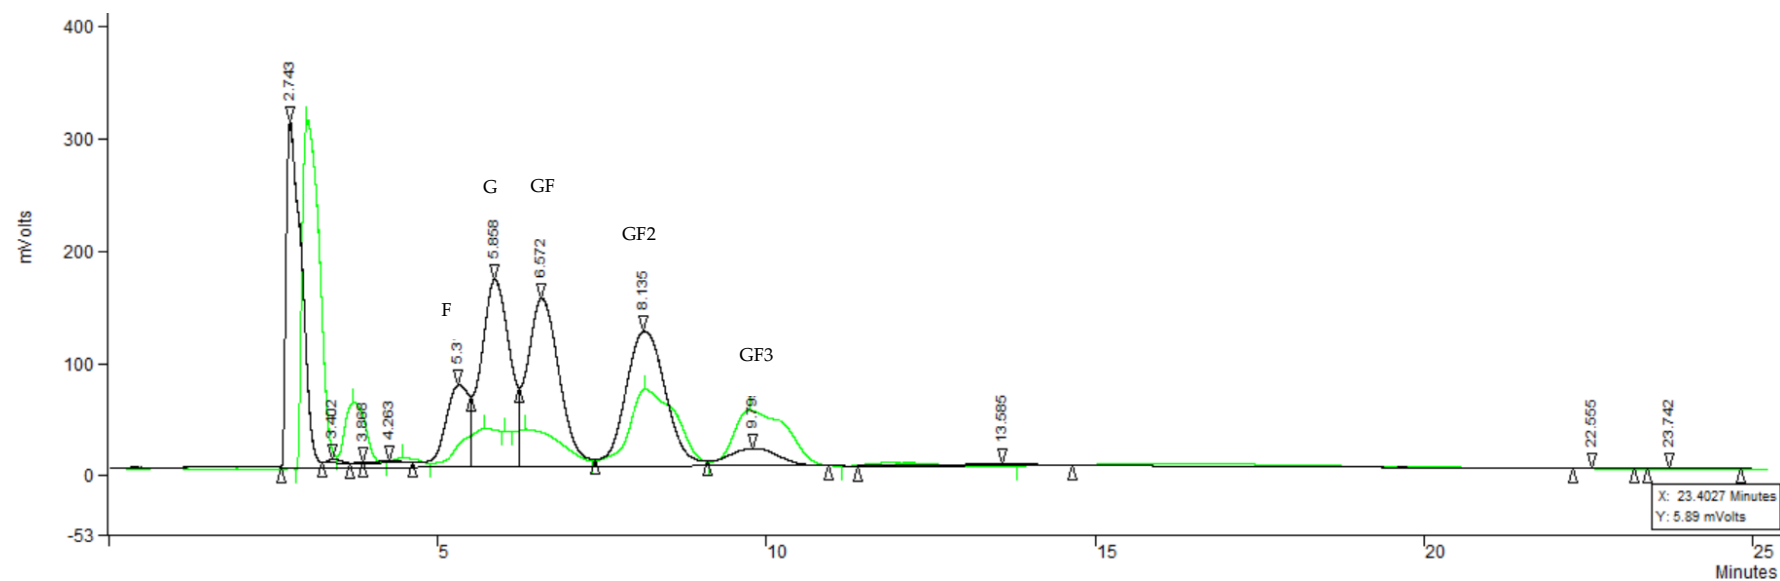

**Figure S4.** Chromatograms obtained by HPLC for: for a fermentation broth sample obtained from the fermentation of Aguamiel and Molasses (AgMe) with *Aspergillus oryzae* before (black line) and after (green line) inoculation of *Saccharomyces cerevisiae* 200 (S200). Fructose (F), glucose (G), sucrose (GF), kestose (GF2), nystose (GF3).

**Table S1.** Sugar concentration obtained on the aguamiel from *Agave salmiana* and on the sugar cane molasses used as raw materials for media formulation.

| Raw material | Fructose (g/L) | Glucose (g/L) | Sucrose (g/L) |
|--------------|----------------|---------------|---------------|
| Aguamiel     | 4.17 ±0.21     | 4.33 ±0.39    | 98.56 ±9.77   |
| Molasses     | 96.10 ±9.56    | 71.35 ±6.20   | 441.41 ±42.02 |

**Table S2.** Statistical analysis of the full Central Composite Design with two factors used for the optimization of fructooligosaccharides production.

| <b>Variables and interactions</b> | <b>Estimated effects</b> | <b>Standard Error</b> | <b>t-value</b> | <b><i>p</i></b> |
|-----------------------------------|--------------------------|-----------------------|----------------|-----------------|
| Mean/Interc                       | -4.580                   | 1.307                 | -3.504         | 0.017*          |
| (1) GFi (L)                       | 0.005                    | 0.004                 | 1.165          | 0.296           |
| GFi (Q)                           | 0.000                    | 0.000                 | -1.855         | 0.123           |
| (2) Inoc (L)                      | 1.348                    | 0.371                 | 3.631          | 0.015*          |
| Inoc (Q)                          | -0.097                   | 0.026                 | -3.711         | 0.013*          |
| 1L by 2L                          | 0.000                    | 0.000                 | 0.474          | 0.656           |

GFi: Initial sucrose concentration, Inoc: Inoculum concentration

\*Significant influence at 95% confidence level.
